# Supplementary material
Source: publisher figshare collection journal article supplement (https://acs.figshare.com/ndownloader/files/35116530)
Supplement: Supplementary file 1 [file 35116530]

Supporting Information for:

**Actuation mechanisms of a semicrystalline elastomer-based polymer  
artificial muscle with high actuation strain**

*Jin Wang<sup>a,b,c</sup>, Zhikai Tu<sup>d</sup>, Huanhuan Zhang<sup>a,b,c</sup>, Meng-Meng Wang<sup>a,b,c</sup>, Weifeng Liu<sup>d,e\*</sup>, Jin-*

*Ping Qu<sup>a,b,c\*</sup>*

<sup>a</sup> National Engineering Research Center of Novel Equipment for Polymer Processing, South  
China University of Technology, Guangzhou 510641, China

<sup>b</sup> Key Laboratory of Polymer Processing Engineering, Ministry of Education, South China  
University of Technology, Guangzhou 510641, China

<sup>c</sup> Guangdong Provincial Key Laboratory of Technique and Equipment for Macromolecular  
Advanced Manufacturing, School of Mechanical and Automotive Engineering, South China  
University of Technology, Guangzhou 510641, China

<sup>d</sup> School of Chemistry and Chemical Engineering, Guangdong Provincial Key Lab of Green  
Chemical Product Technology, South China University of Technology, Guangzhou 510640,  
China

<sup>e</sup> State Key Laboratory of Pulp and Paper Engineering, South China University of Technology,

Guangzhou 510640, China

\*Email: jpqu@scut.edu.cn (Jin-Ping Qu); weifengliu@scut.edu.cn (Weifeng Liu)

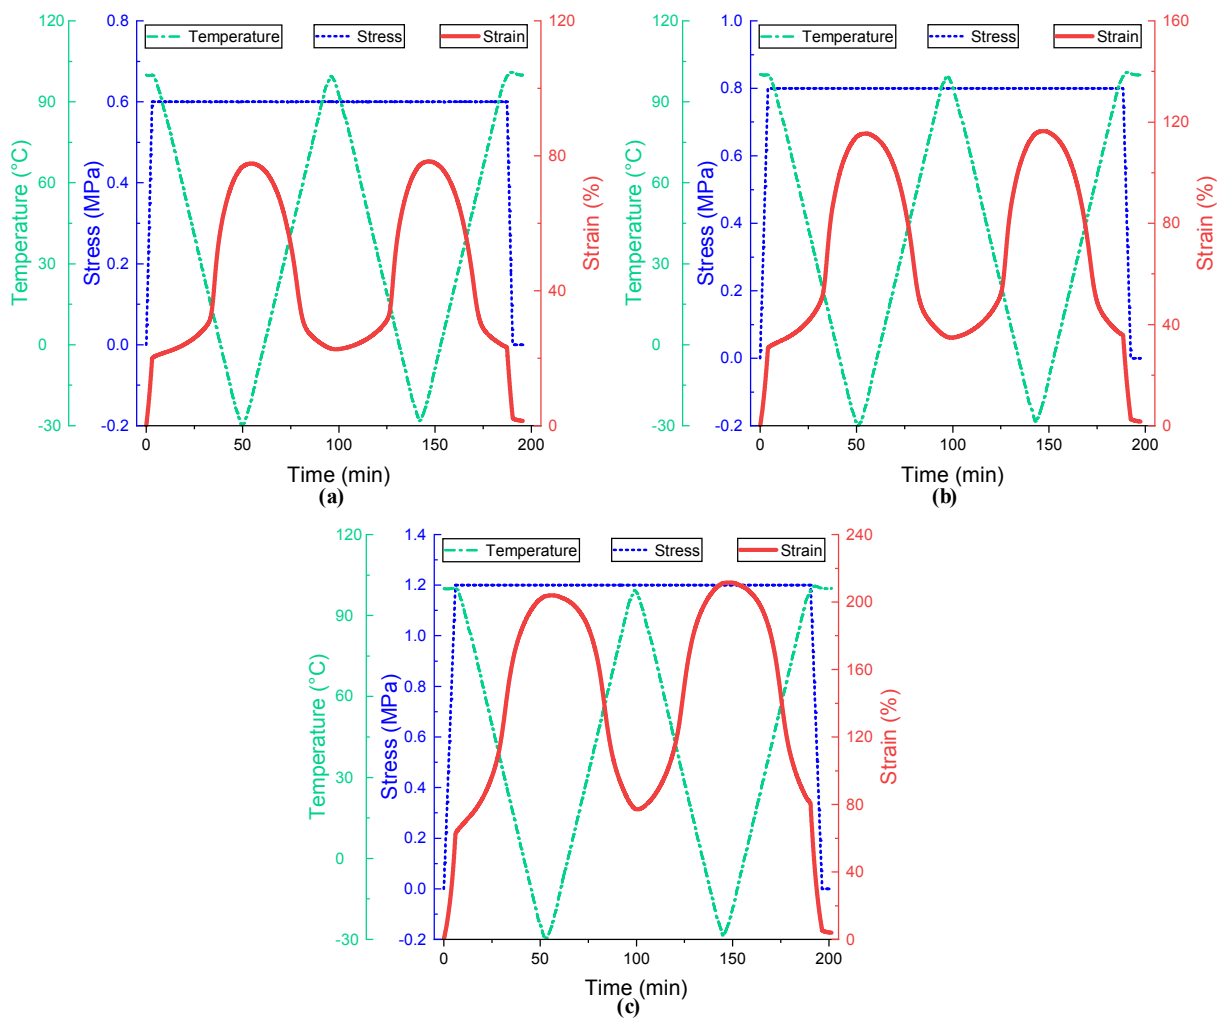

**Figure S1.** The temperature/stress/strain-time curves recorded in the DMA tests for studying the stress-dependent actuation behavior of the EPDM elastomer: (a) 0.6 MPa, (b) 0.8 MPa, and (c)

1.2 MPa (for the stress of 1.0 MPa, the curves are already displayed in Figure 1)

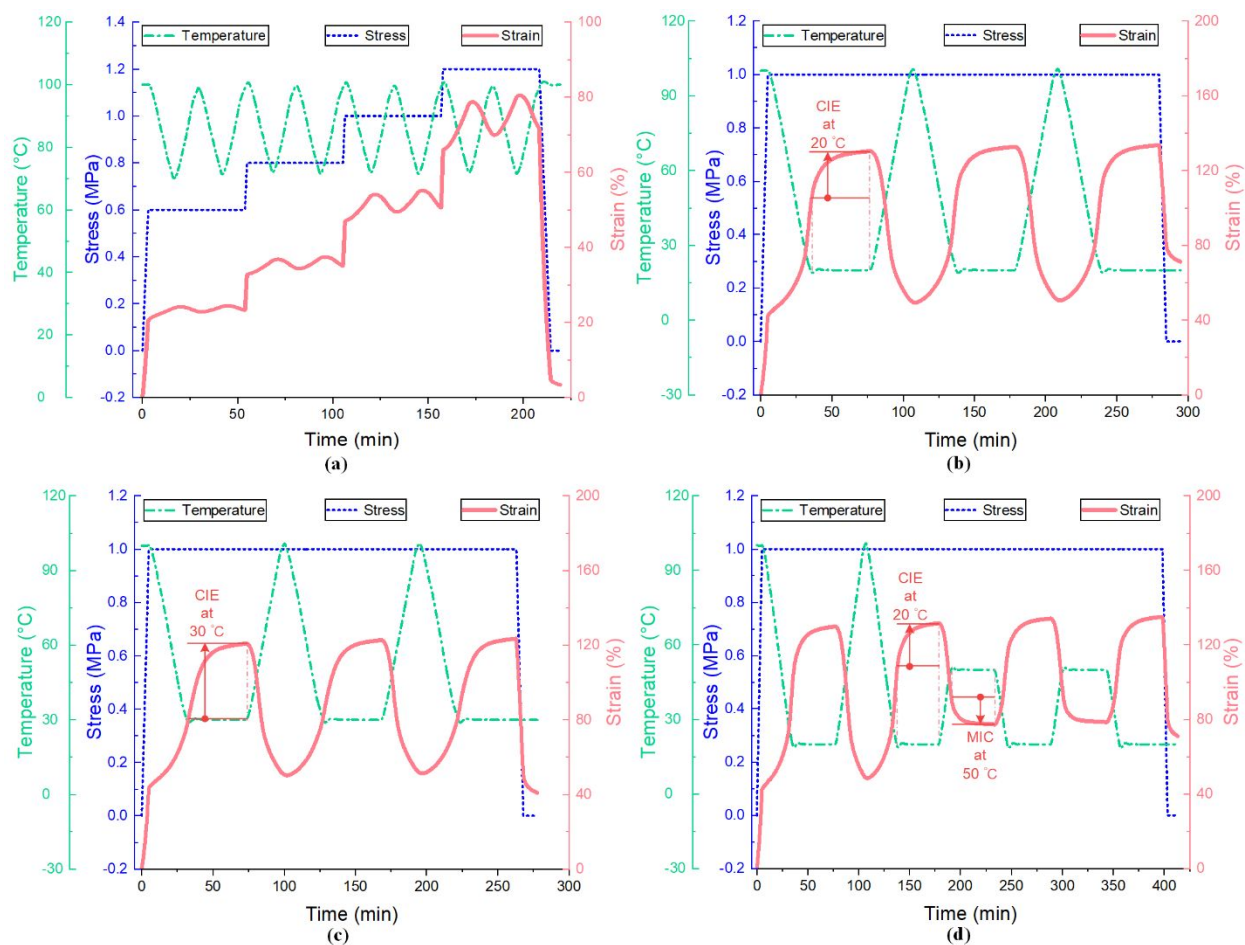

**Figure S2.** The temperature/stress/strain-time curves recorded in the DMA tests for directly demonstrating the eeTAM and cmtTAM (CIE and MIC) of the EPDM elastomer: (a) eeTAM above the melting temperature, (b) CIE at 20 °C, (c) CIE at 30 °C, and (d) CIE at 20 °C and MIC at 50 °C

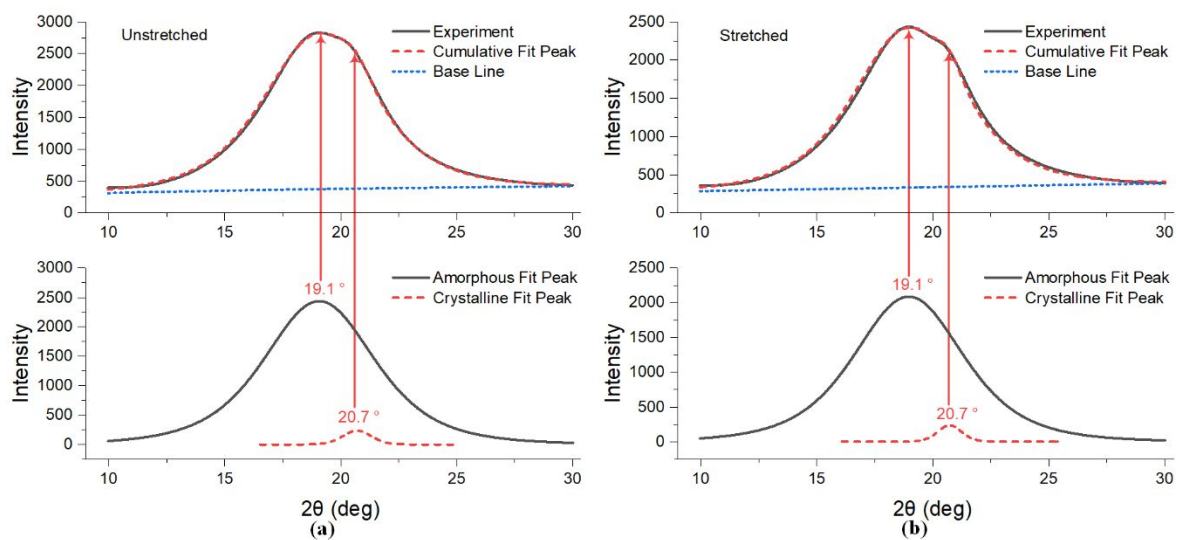

**Figure S3.** The fit peaks of the  $2\theta$  profiles for the two samples crystallized at 20 °C: (a) the unstretched sample, and (b) the stretched sample.

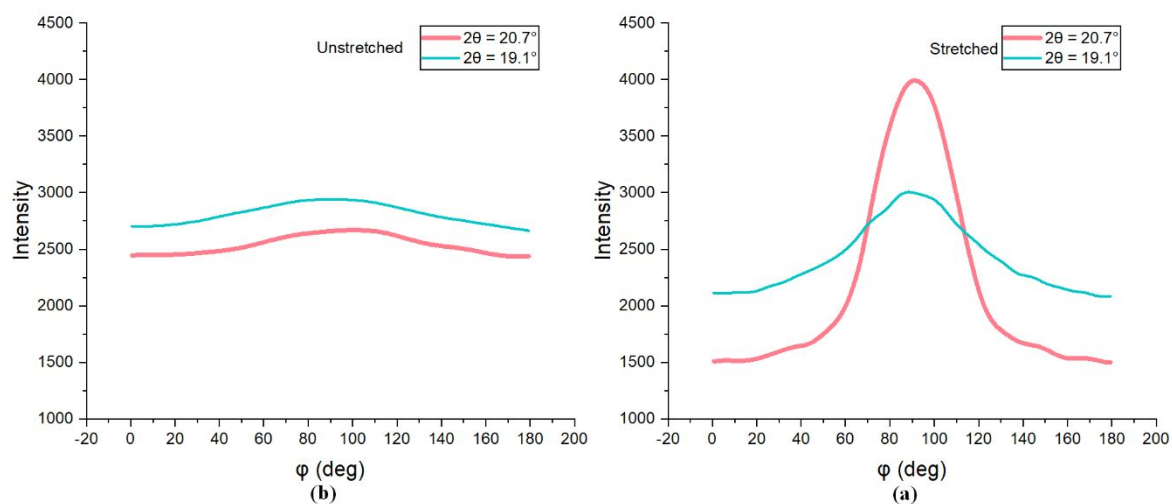

**Figure S4.** The azimuthal variation of the X-ray diffraction intensity near  $2\theta = 20.7^\circ$  and  $19.1^\circ$  for the two samples crystallized at  $20^\circ\text{C}$ : (a) the unstretched sample, and (b) the stretched sample.

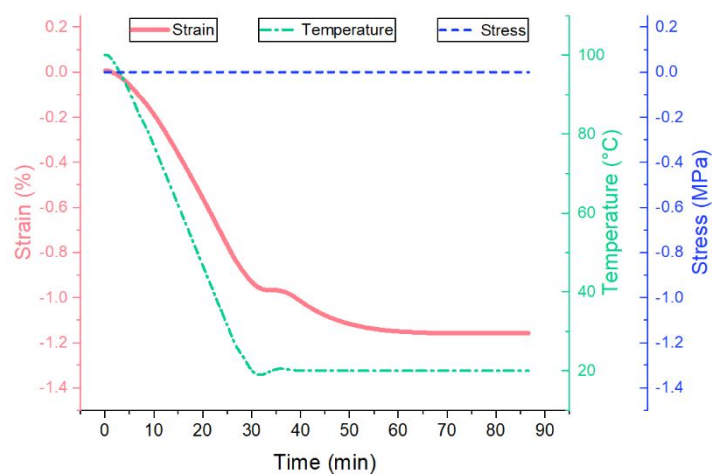

**Figure S5.** The strain/temperature/stress-time curves recorded in the crystallization test at  $20^\circ\text{C}$  under free state; the strain of the EPDM elastomer decreases as the temperature decreases from  $100^\circ\text{C}$  to  $20^\circ\text{C}$  and continues to decrease until the crystallization at  $20^\circ\text{C}$  is nearly finished, showing the elastomer only contracts in isotropic crystallization.
